# Supplementary material for: Combined PK/PD Index May Be a More Appropriate PK/PD Index for Cefoperazone/Sulbactam against Acinetobacter baumannii in Patients with Hospital-Acquired Pneumonia
Source: MDPI journal article supplement (doi:10.3390/antibiotics11050703), 2022-05-23
Supplement: s1 [file s1]

# Supplementary Materials

**Title: Combined PK/PD Index May Be a More Appropriate PK/PD Index for Cefoperazone/Sulbactam Against *Acinetobacter baumannii* in Patients with Hospital-Acquired Pneumonia**

**Table S1.** Distribution frequency of MIC of cefoperazone/sulbactam (%)

| Bacteria (strains)        | Cefoperazone/sulbactam MIC (mg/L) |     |      |           |             |           |             |        |         |
|---------------------------|-----------------------------------|-----|------|-----------|-------------|-----------|-------------|--------|---------|
|                           | 1/0.5                             | 2/1 | 4/2  | 8/4       | 16/8        | 32/16     | 64/32       | 128/64 | 256/128 |
| <i>A. baumannii</i> (32)  | 6.3                               | 6.3 | 12.5 | 12.5      | <u>21.9</u> | 18.8      | <b>15.6</b> | 3.1    | 3.1     |
| <i>P. aeruginosa</i> (25) | 0                                 | 8   | 20   | <u>24</u> | 32          | <b>12</b> | 4           | 0      | 0       |

Underline and bold indicate corresponding MIC are MIC<sub>50</sub> and MIC<sub>90</sub>, respectively

**Table S2.** Effect of high blood pressure on %T>MIC of cefoperazone

| %T>MIC (Mean±SD)      |                        | Difference of %T>MIC |
|-----------------------|------------------------|----------------------|
| high blood pressure=0 | high blood pressure =1 |                      |
| 84.5±25.2 (%)         | 85.5±25.7 (%)          | 1.0±1.4 (%)          |

Difference = %T>MIC(high blood pressure=1) - %T>MIC(high blood pressure=0). 1 means yes, 0 means no

**Table S3.** Effect of covariates on %T>MIC of sulbactam

|                      | Age=18 years    | Age=46 years    | Age=70 years    |
|----------------------|-----------------|-----------------|-----------------|
| Do not take baclofen | 31.11±20.64 (%) | 41.75±25.55 (%) | 58.29±29.83 (%) |
| Taking baclofen      | 32.05±21.76 (%) | 42.93±26.48 (%) | 59.45±30.52 (%) |

Results were shown as Mean±SD

**Table S4.** PK/PD cutoff based on PK/PD index for cefoperazone (mg/L). Dosing frequency was q8h. Target was for clinical efficacy against infection by Ab.  
Based on %T>MIC (target=54.8%)

| Dose<br>(g) | Infusion time (h) |    |    |    |    |
|-------------|-------------------|----|----|----|----|
|             | 0.5               | 1  | 2  | 3  | 4  |
| 1           | 8                 | 8  | 8  | 16 | 16 |
| 1.5         | 16                | 16 | 16 | 16 | 16 |
| 3           | 32                | 32 | 32 | 32 | 32 |
| 4           | 32                | 32 | 32 | 64 | 64 |
| 6           | 64                | 64 | 64 | 64 | 64 |

Based on AUC<sub>0-24</sub>/MIC (target=44.3)

|              |   |     |    |    |    |
|--------------|---|-----|----|----|----|
| Dose (g)     | 1 | 1.5 | 3  | 4  | 6  |
| PK/PD cutoff | 8 | 8   | 16 | 32 | 32 |

**Table S5.** PK/PD cutoff based on PK/PD index for sulbactam (mg/L). Dosing frequency was q8h. Target was for clinical efficacy against infection by Ab.  
Based on %T>MIC (target=36.6%)

| Dose<br>(g) | Infusion time (h) |   |   |    |    |
|-------------|-------------------|---|---|----|----|
|             | 0.5               | 1 | 2 | 3  | 4  |
| 1.5         | 2                 | 2 | 4 | 8  | 8  |
| 2           | 2                 | 4 | 4 | 8  | 8  |
| 3           | 4                 | 4 | 8 | 16 | 16 |

Based on AUC<sub>0-24</sub>/MIC (target=23.3)

|              |     |   |   |
|--------------|-----|---|---|
| Dose (g)     | 1.5 | 2 | 3 |
| PK/PD cutoff | 4   | 8 | 8 |

**Table S6.** Cumulative fraction of response (CFR) based on PK/PD index for cefoperazone (%). Dosing frequency was q8h. Target was for clinical efficacy against Ab.

Based on %T>MIC (target=54.8%)

| Dose<br>(g) | Infusion time (h) |    |    |    |    |
|-------------|-------------------|----|----|----|----|
|             | 0.5               | 1  | 2  | 3  | 4  |
| 1           | 56                | 57 | 60 | 62 | 64 |
| 1.5         | 67                | 68 | 71 | 73 | 75 |
| 2           | 74                | 76 | 78 | 80 | 82 |
| 3           | 84                | 85 | 87 | 89 | 90 |
| 4           | 90                | 90 | 92 | 93 | 94 |
| 6           | 94                | 95 | 95 | 96 | 96 |

Based on AUC<sub>0-24</sub>/MIC (target=44.3)

| Dose (g) | 1  | 1.5 | 2  | 3  | 4  | 6  |
|----------|----|-----|----|----|----|----|
| CFR (%)  | 47 | 59  | 67 | 78 | 85 | 92 |

**Table S7.** Cumulative fraction of response (CFR) based on PK/PD index for sulbactam (%). Dosing frequency was q8h. Target was for clinical efficacy against Ab.

Based on %T>MIC (target=36.6%)

| Dose<br>(g) | Infusion time (h) |    |    |    |    |
|-------------|-------------------|----|----|----|----|
|             | 0.5               | 1  | 2  | 3  | 4  |
| 1           | 38                | 42 | 49 | 56 | 59 |
| 1.5         | 48                | 52 | 60 | 67 | 70 |
| 2           | 55                | 60 | 68 | 75 | 78 |
| 3           | 66                | 69 | 78 | 85 | 87 |

Based on AUC<sub>0-24</sub>/MIC (target=23.3)

| Dose (g)     | 1  | 1.5 | 2  | 3  |
|--------------|----|-----|----|----|
| PK/PD cutoff | 49 | 61  | 69 | 79 |

**Table S8.** Construction of combined PK/PD index and its correlation with clinical efficacy against Ab

| Combined PK/PD index                                  | P <sub>logistic</sub> | P <sub>cross</sub> | P <sub>logistic2</sub> |
|-------------------------------------------------------|-----------------------|--------------------|------------------------|
| %( $T > MIC_{cpz} * T > MIC_{sul}$ )                  | 0.047                 | 0.020              | 0.041                  |
| $AUC_{0-24}/MIC_{cpz} * AUC_{0-24}/MIC_{sul}$         | 0.299                 | 0.075              | 0.100                  |
| $Ln(AUC_{0-24}/MIC)_{cpz} * Ln(AUC_{0-24}/MIC)_{sul}$ | 0.057                 | 0.030              | 0.057                  |
| $AUC_{0-24}/MIC_{cpz} * \%T > MIC_{sul}$              | 0.206                 | 0.051              | 0.078                  |
| $Ln(AUC_{0-24}/MIC)_{cpz} * \%T > MIC_{sul}$          | 0.065                 | 0.020              | 0.041                  |
| $\%T > MIC_{cpz} * AUC_{0-24}/MIC_{sul}$              | 0.121                 | 0.030              | 0.057                  |
| $\%T > MIC_{cpz} * Ln(AUC_{0-24}/MIC)_{sul}$          | 0.040                 | 0.025              | 0.042                  |

P<sub>logistic</sub>: P value obtained from logistic regression; P<sub>cross</sub>: P value obtained from cross tabulation; P<sub>logistic2</sub>: P value obtained from logistic regression after combined PK/PD index was transformed into binary data (value was 1 if it is greater than target, else it was 0)

cpz: cefoperazone; sul: sulbactam



**Table S9.** Cumulative fraction of response (CFR) of  $\%(T > MIC_{cpz} * T > MIC_{sul})$  against Ab (%). Dosing frequency was q8h.

| Regimen of<br>cefoperazone/<br>sulbactam | Clinical efficacy |     |     |     |     | Microbiological efficacy |     |     |     |     |
|------------------------------------------|-------------------|-----|-----|-----|-----|--------------------------|-----|-----|-----|-----|
|                                          | T=0.5             | T=1 | T=2 | T=3 | T=4 | T=0.5                    | T=1 | T=2 | T=3 | T=4 |
| 1g/1g                                    | 32                | 36  | 42  | 48  | 53  | 18                       | 20  | 24  | 29  | 36  |
| 2g/1g                                    | 36                | 40  | 46  | 54  | 58  | 19                       | 22  | 25  | 31  | 38  |
| 1.5g/1.5g                                | 42                | 45  | 52  | 60  | 64  | 25                       | 27  | 32  | 38  | 46  |
| 2g/2g                                    | 49                | 53  | 61  | 68  | 72  | 30                       | 33  | 38  | 45  | 54  |
| 2g/3g                                    | 56                | 60  | 67  | 73  | 77  | 37                       | 40  | 45  | 52  | 62  |
| 6g/1g                                    | 38                | 42  | 49  | 56  | 59  | 20                       | 22  | 26  | 31  | 38  |

CFR for CPZ/SUL 3g/1g, 4g/1g was closed to that of CPZ/SUL (2g/1g), therefore it was not shown in the table

T means infusion time (h)

**Table S10.** Cutoff based on  $PTA(AUC_{0-24}/MIC_{cpz}) * PTA(AUC_{0-24}/MIC_{sul})$  (mg/L).  
Dosing frequency was q8h.

| Regimen of cefoperazone/sulbactam | Clinical efficacy | Microbiological efficacy |
|-----------------------------------|-------------------|--------------------------|
| 2g/1g                             | 8                 | 4                        |
| 2g/2g                             | 16                | 4                        |
| 2g/3g                             | 16                | 4                        |
| 4g~6g/1g                          | 8                 | 4                        |

Cutoff was for cefoperazone

**Table S11.** Comparison of PK/PD cutoff obtained from combined PTA or single drug

| PK/PD index                     | Type of efficacy         | Dosing regimen of CPZ/SUL (q12h) |                               |                              |                          |                          |
|---------------------------------|--------------------------|----------------------------------|-------------------------------|------------------------------|--------------------------|--------------------------|
|                                 |                          | 2g/1g                            | 2g/2g                         | 2g/3g                        | 4g/1g                    | 6g/1g                    |
| %T>MIC                          | Clinical efficacy        | =SUL<br>(0.5-4 mg/L)             | =SUL<br>(1-8 mg/L)            | Close to SUL<br>(2-16 mg/L)  | =SUL<br>(0.5-4 mg/L)     | =SUL<br>(0.5-4 mg/L)     |
|                                 | Microbiological efficacy | =SUL<br>(0.125-0.5 mg/L)         | Close to SUL<br>(0.25-2 mg/L) | Close to SUL<br>(0.5-1 mg/L) | =SUL<br>(0.125-0.5 mg/L) | =SUL<br>(0.125-0.5 mg/L) |
| AUC <sub>0-24</sub> /MIC        | Clinical efficacy        | =SUL<br>(4 mg/L)                 | =SUL or CPZ<br>(8 mg/L)       | =CPZ<br>(8 mg/L)             | =SUL<br>(4 mg/L)         | =SUL<br>(4 mg/L)         |
|                                 | Microbiological efficacy | =SUL or CPZ<br>(2 mg/L)          | =CPZ<br>(2 mg/L)              | =CPZ<br>(2 mg/L)             | =SUL<br>(2 mg/L)         | =SUL<br>(2 mg/L)         |
| Dosing regimen of CPZ/SUL (q6h) |                          |                                  |                               |                              |                          |                          |
| %T>MIC                          | Clinical efficacy        | =SUL<br>(4-16 mg/L)              | =SUL<br>(8-32 mg/L)           | =SUL<br>(16-32 mg/L)         | =SUL<br>(4-16 mg/L)      | =SUL<br>(4-16 mg/L)      |
|                                 | Microbiological efficacy | =SUL<br>(1-8 mg/L)               | =SUL<br>(2-16 mg/L)           | =SUL<br>(4-32 mg/L)          | =SUL<br>(1-8 mg/L)       | =SUL<br>(1-8 mg/L)       |
| AUC <sub>0-24</sub> /MIC        | Clinical efficacy        | =SUL<br>(8 mg/L)                 | =SUL or CPZ<br>(16 mg/L)      | =CPZ<br>(16 mg/L)            | =SUL<br>(8 mg/L)         | =SUL<br>(8 mg/L)         |
|                                 | Microbiological efficacy | =SUL or CPZ<br>(4 mg/L)          | =CPZ<br>(4 mg/L)              | =CPZ<br>(4 mg/L)             | =SUL<br>(4 mg/L)         | =SUL<br>(4 mg/L)         |

=SUL: PK/PD cutoff based on combined PTA = PK/PD cutoff based on sulbactam

Close to SUL: PK/PD cutoff based on combined PTA was close to PK/PD cutoff based on sulbactam

=SUL or CPZ: PK/PD cutoff based on combined PTA = PK/PD cutoff based on sulbactam or cefoperazone

Close to CPZ: PK/PD cutoff based on combined PTA was close to PK/PD cutoff based on cefoperazone

=CPZ: PK/PD cutoff based on combined PTA = PK/PD cutoff based on cefoperazone

In parenthesis, range of PK/PD cutoff was obtained from combined PTA. Cutoff was for cefoperazone. Infusion time was 0.5-4h.

**Table S12.** Effect of age on PK/PD cutoff of sulbactam

| Age<br>(years) | Clinical efficacy |     |     |     |     | Microbiological efficacy |       |      |     |     |
|----------------|-------------------|-----|-----|-----|-----|--------------------------|-------|------|-----|-----|
|                | T=0.5             | T=1 | T=2 | T=3 | T=4 | T=0.5                    | T=1   | T=2  | T=3 | T=4 |
| 18             | 0.5               | 0.5 | 2   | 4   | 4   | 0.125                    | 0.125 | 0.25 | 0.5 | 1   |
| 70             | 4                 | 4   | 8   | 8   | 8   | 1                        | 2     | 2    | 2   | 4   |

T means infusion time (h). Unit of cutoff: mg/L.

PK/PD index was %T>MIC. Target for clinical and microbiological efficacy was 36.6% and 61.1%, respectively.

Dosing regimen of sulbactam was 1g(q8h)

**Table S13.** Effect of age on CFR of %>MIC of sulbactam

| Age<br>(years) | Clinical efficacy |     |     |     |     | Microbiological efficacy |     |     |     |     |
|----------------|-------------------|-----|-----|-----|-----|--------------------------|-----|-----|-----|-----|
|                | T=0.5             | T=1 | T=2 | T=3 | T=4 | T=0.5                    | T=1 | T=2 | T=3 | T=4 |
| 18             | 23                | 26  | 35  | 46  | 50  | 8                        | 10  | 13  | 18  | 26  |
| 70             | 57                | 60  | 64  | 67  | 68  | 37                       | 40  | 44  | 48  | 54  |

T means infusion time (h). Unit of CFR: %

PK/PD index was %T>MIC. Target for clinical and microbiological efficacy was 36.6% and 61.1%, respectively.

Dosing regimen of sulbactam was 1g(q8h)

**Table S14. Inclusion and exclusion criteria**

| No | Inclusion criteria                                                                                                                                                                                                                                                                                                                                                                                                                                                                                                                         |
|----|--------------------------------------------------------------------------------------------------------------------------------------------------------------------------------------------------------------------------------------------------------------------------------------------------------------------------------------------------------------------------------------------------------------------------------------------------------------------------------------------------------------------------------------------|
| 1  | Sign an informed consent                                                                                                                                                                                                                                                                                                                                                                                                                                                                                                                   |
| 2  | Age was 18-80 years old                                                                                                                                                                                                                                                                                                                                                                                                                                                                                                                    |
| 3  | Women of childbearing age had negative results for urine pregnancy test (limit of detection of $\beta$ -HCG was 25 IU/L)                                                                                                                                                                                                                                                                                                                                                                                                                   |
| 4  | Inpatients diagnosed with HAP or VAP caused by MDR Ab or PA sensitive or intermediate to CPZ/SUL                                                                                                                                                                                                                                                                                                                                                                                                                                           |
| 5  | Systematic antibacterial therapy was less than 48h before enrollment. If systematic antibacterial therapy was longer than 48h, patients with unsolved infection symptoms or signs, and positive sputum culture could be enrolled                                                                                                                                                                                                                                                                                                           |
| No | Exclusion criteria                                                                                                                                                                                                                                                                                                                                                                                                                                                                                                                         |
|    | HAP was accompanied by one of following:                                                                                                                                                                                                                                                                                                                                                                                                                                                                                                   |
|    | i) Respiratory failure defined as $\text{FiO}_2 > 35\%$ which maintains $\text{SaO}_2 > 90\%$                                                                                                                                                                                                                                                                                                                                                                                                                                              |
| 1  | ii) Chest X-ray examination showed evidence of rapid progressive infiltration involved multilobar or porosis formation                                                                                                                                                                                                                                                                                                                                                                                                                     |
|    | iii) Severe pyemia with hypotension or/and evidences of organic dysfunction (such as shock defined as $\text{SBP} < 90\text{mmHg}$ or $\text{DBP} < 60\text{mmHg}$ , requiring $> 4\text{h}$ of administration of vasopressors)                                                                                                                                                                                                                                                                                                            |
|    | Patients with severe VAP diagnosed by one item of major criteria or two items of minor criteria:                                                                                                                                                                                                                                                                                                                                                                                                                                           |
|    | Major criteria: i) Conscious disturbance caused by pneumoniae; ii) Septic shock; iii) Impairment of renal function (urine volume $< 80\text{ml}/4\text{h}$ ) or the elevation of serum creatinine for patients with normal renal function before; iv) Progressive decrease of oxygenation index ( $\text{PaO}_2/\text{FiO}_2$ ) or pulmonary compliance, or progressive increase of air way resistance which could not be explained by non-infection factors; v) Enlarge of area of radiographic infiltration in lung $> 50\%$ within 48h. |
| 2  | Minor criteria: i) Hyperpyrexia ( $\geq 39^\circ\text{C}$ ) or hypothermia ( $\leq 36^\circ\text{C}$ ); ii) Radiographic infiltration in lung was multilobar or bilateral; iii) $\text{SBP} < 90\text{mmHg}$ ; iv) $\text{DBP} < 60\text{mmHg}$ ; v) Impairment of liver function after exclusion of basic liver disease and drug-induced liver injury                                                                                                                                                                                     |
| 3  | Patients with infection caused by bacteria (such as methicillin-resistant Staphylococci, Listeria and Enterococci) beyond antibacterial spectrum of CPZ/SUL                                                                                                                                                                                                                                                                                                                                                                                |
| 4  | Patients with leucocytopenia ( $\text{WBC} < 4.0 \times 10^9/\text{L}$ ) or neutrocytopenia (granulocyte $< 2.0 \times 10^9/\text{L}$ ), or patients with immunodeficiency treated by glucocorticosteroid (prednisone $20\text{mg}/\text{d}$ , more than two weeks), or by immunosuppressive agents                                                                                                                                                                                                                                        |
| 5  | Patients with combination therapy that might affect efficacy of CPZ/SUL after exclusion of vancomycin, norvancomycin, teicoplanin and antifungal agents                                                                                                                                                                                                                                                                                                                                                                                    |
| 6  | Patients with disease that might have impacts on course and evaluation of infectious process, e.g., bronchial obstruction, obstructive pneumonia, and active pulmonary malignant lesions                                                                                                                                                                                                                                                                                                                                                   |
| 7  | Patients with liver failure or severe bile duct obstruction. ALT and/or AST were $\geq 3$ times of upper normal limit                                                                                                                                                                                                                                                                                                                                                                                                                      |
| 8  | Patients with history of allergy to penicillins, cephalosporins, sulbactam or tazobactam                                                                                                                                                                                                                                                                                                                                                                                                                                                   |
| 9  | Pregnancy or breast-feeding women                                                                                                                                                                                                                                                                                                                                                                                                                                                                                                          |
| 10 | Patients with hemorrhagic tendency                                                                                                                                                                                                                                                                                                                                                                                                                                                                                                         |
| 11 | Any conditions considered by investigators that might increase the risk of patients or interfere with study results                                                                                                                                                                                                                                                                                                                                                                                                                        |

HAP and VAP definitions:

- HAP refers to pneumonia occurred 48h after the admission, or pneumonia occurred 48h after leaving hospital for patients infected during hospitalization. VAP refers to pneumonia which occurred 24h after endotracheal intubation and mechanical ventilation, or pneumonia occurred 48h after stopping mechanical ventilation and clearing artificial airway
- Patients had progressing infiltration on chest radiograph
- One of following criteria should be met: body temperature  $> 37.5^\circ\text{C}$  or rectal temperature  $> 38^\circ\text{C}$ ; white blood cell count  $> 10 \times 10^9/\text{L}$  or neutrophil count  $> 70\%$
- At least two of following should be met: cough, chest pain, moist crackles in lung by auscultation or purulent sputum

Abbreviations: Ab *Acinetobacter baumannii*, ALT alanine aminotransferase, AST aspartate aminotransferase, CPZ/SUL cefoperazone/sulbactam, DBP diastolic blood pressure, HAP hospital-acquired pneumoniae, MDR multi-drug resistant, SBP systolic blood pressure, PA *Pseudomonas aeruginosa*, VAP ventilator-associated pneumonia, WBC white blood cell count

**Table S15.** Sampling times of cefoperazone/sulbactam

| Group | Day of sampling     |                      | Pre-dose | Mid-point of infusion | After the end of infusion (h) |     |   |   |   |   |       |
|-------|---------------------|----------------------|----------|-----------------------|-------------------------------|-----|---|---|---|---|-------|
|       |                     |                      |          |                       | 0                             | 0.5 | 1 | 2 | 4 | 6 | 12 16 |
| 1     | 4 <sup>th</sup> day | 1 <sup>st</sup> dose | ✓        | ✓                     | ✓                             | ✓   | ✓ | ✓ | ✓ | ✓ |       |
| 2     | Last day            | Last dose            |          | ✓                     | ✓                             | ✓   | ✓ | ✓ | ✓ | ✓ | ✓     |
| 3     | Last day            | Last dose            |          | ✓                     | ✓                             | ✓   | ✓ | ✓ | ✓ | ✓ | ✓     |
| 4     | 1 <sup>st</sup> day | 1 <sup>st</sup> dose |          |                       | ✓                             | ✓   | ✓ | ✓ | ✓ | ✓ |       |

Infusion time was 1.5-2 h

**Table S16.** Definition of success and failure for clinical and microbiological efficacy

| Efficacy                 | Result               | Definition                                                                                                                                                                                                                                                                                                                                                                   |
|--------------------------|----------------------|------------------------------------------------------------------------------------------------------------------------------------------------------------------------------------------------------------------------------------------------------------------------------------------------------------------------------------------------------------------------------|
| Clinical Efficacy        | Success              | Recovery of infectious symptoms, signs, clinical laboratory tests and X-ray test to normal or pre-infection state                                                                                                                                                                                                                                                            |
|                          | Failure <sup>#</sup> | 1) Infectious symptoms, signs and laboratory test did not improve or even get worse within 72 h after drug therapy<br>2) Infectious symptoms appeared again after complete of therapy<br>3) Other antibacterial were needed for continuous therapy<br>4) Adverse drug reactions appeared which result termination of drug administration before complete of treatment course |
| Microbiological efficacy | Success <sup>+</sup> | 1) Bacterial culture is negative after drug therapy<br>2) Patient did not have material for bacterial culture and clinical efficacy was success<br>3) Eradication of original pathogen and appearance of new pathogen without any infectious symptoms                                                                                                                        |
|                          | Failure <sup>#</sup> | 1) Bacteria still exists after drug therapy<br>2) Bacterial culture turns to negative, then bacteria reappear during treatment<br>3) Bacteria are cleared. However, new bacteria appear accompanied with clinical symptoms and signs                                                                                                                                         |

<sup>+</sup> Efficacy is success if the situation meets one of definitions

<sup>#</sup> Efficacy is failure if the situation meets one of definitions



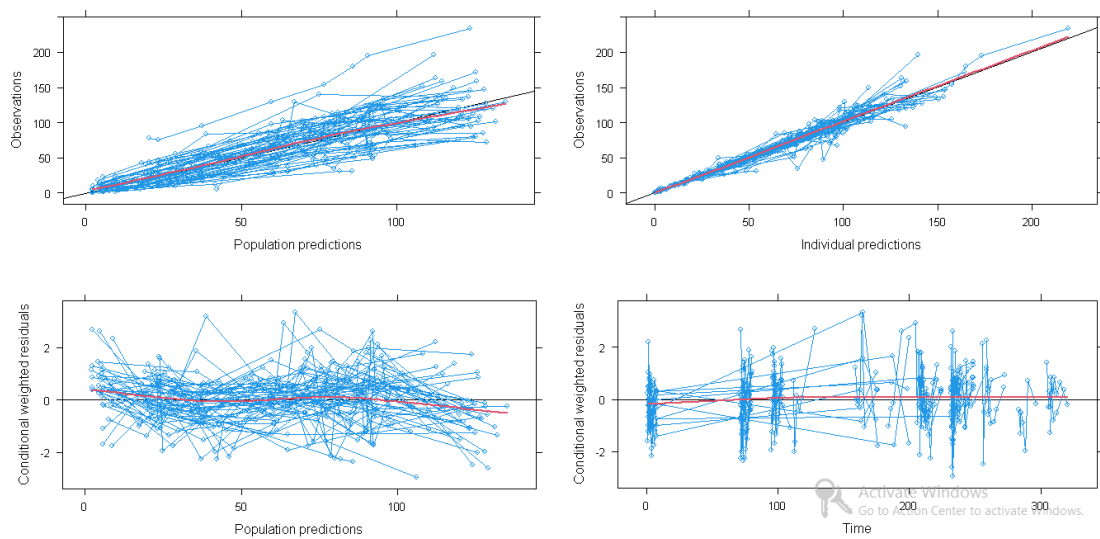

**Figure S1.** Goodness of fit plot for population pharmacokinetic model of cefoperazone. Blue circle: actual data. Black line: identity line (first row) or zero horizontal line (second row). Red line: locally weighted linear regression.

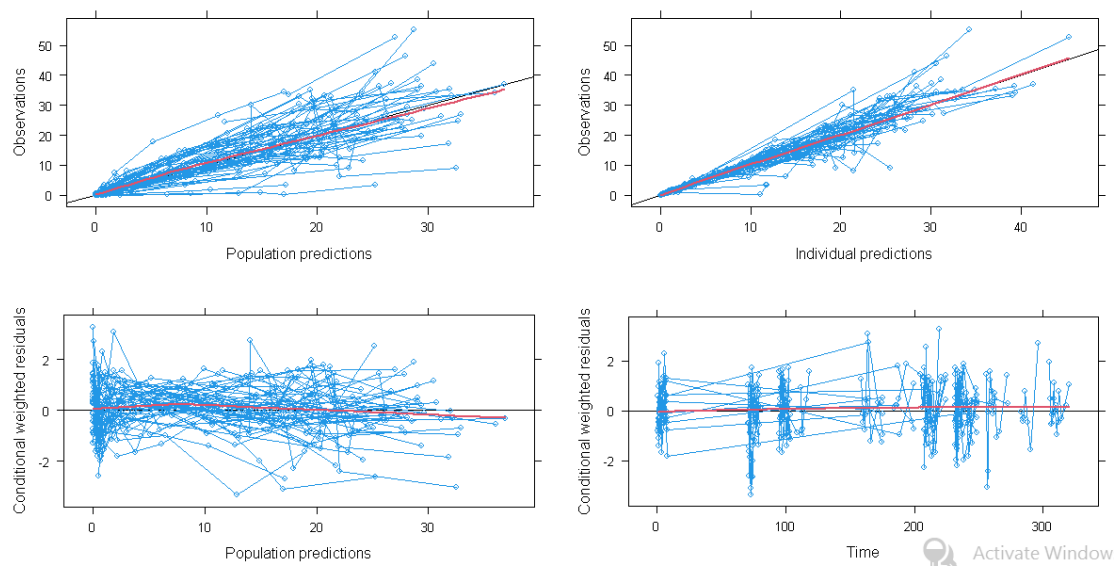

**Figure S2.** Goodness of fit plot for population pharmacokinetic model of sulbactam. Blue circle: actual data. Black line: identity line (first row) or zero horizontal line (second row). Red line: locally weighted linear regression.

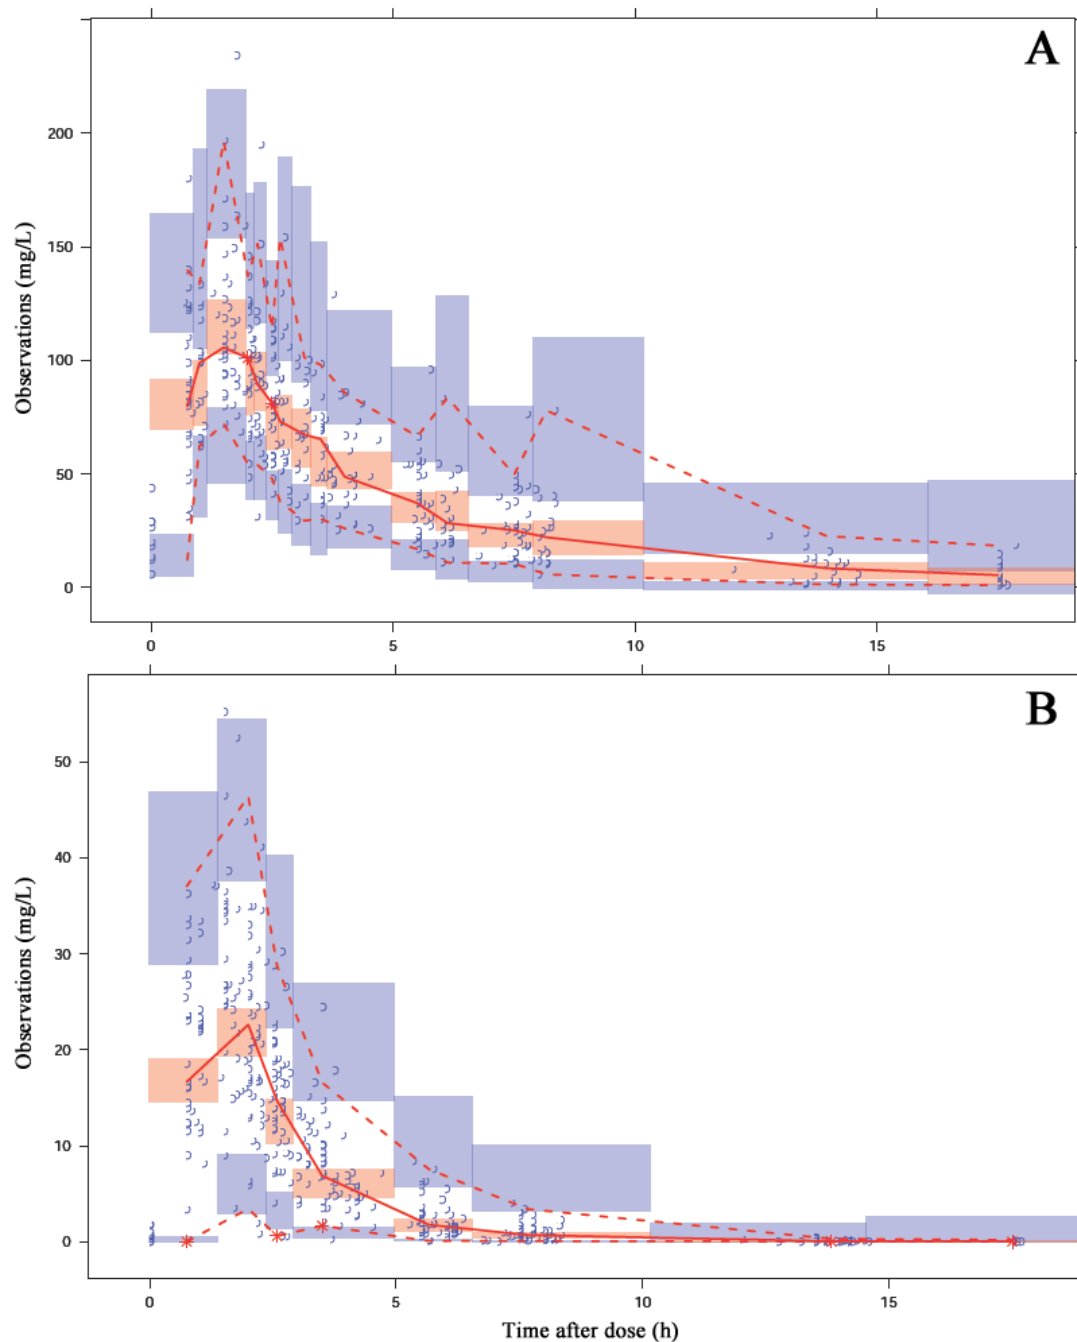

**Figure S3.** Visual predictive check for population pharmacokinetic model of cefoperazone (A) and sulbactam (B). Solid and dash red line mean median and 90% percentile for actual data, while red and blue area mean 95% confidence interval for median and 90% percentile obtained from simulated data.
